# Supplementary material for: Synthesis of ordered Ca- and Li-doped mesoporous silicas for H2 and CO2 adsorption at ambient temperature and pressure
Source: Royal Society of Chemistry journal article supplement (doi:10.1039/c8ra05772a), 2018-01-01

## Supporting information

### Synthesis of ordered Ca- and Li-doped mesoporous silicas for H<sub>2</sub> and CO<sub>2</sub> adsorption at ambient temperature and pressure

Nabanita Pal,<sup>\*a</sup> Taeyeon Kim,<sup>b</sup> Jae-Seo Park,<sup>b</sup> and Eun-Bum Cho<sup>\*b</sup>

<sup>a</sup>*Faculty of Science and Technology, The ICFAI Foundation for Higher Education,  
Donthanapally, Shankarapalli Road, Hyderabad -501203, India.*

<sup>b</sup>*Department of Fine Chemistry, Seoul National University of Science and Technology, 232  
Gongneung-ro, Nowon-gu, Seoul 01811, Republic of Korea.*

#### Figure Caption

- Fig. S1** Wide angle XRD data of all MCM-41 type Ca-doped silica samples. Spectra of the samples (a) CHMS-1, (b) CHMS-2, (c) CHMS-3, and (d) CHMS-5.
- Fig. S2** Wide angle XRD data of all Li-MCM type samples named (a) LHMS-1, (b) LHMS-2, (c) LHMS-3, and (d) LHMS-5.
- Fig. S3** Selective gas uptake of CO<sub>2</sub> calibrated by subtracting N<sub>2</sub> gas uptake for the samples at temperature 120 °C. (a) All CHMS and (b) All LHMS samples.
- Fig. S4** (a) CO<sub>2</sub> and (b) H<sub>2</sub> uptake for CHMS-5 samples depending on temperature up to 900 °C.
- Fig. S5** Reversible H<sub>2</sub> uptake for CHMS-5 sample up to 9 cycles at ambient temperature.

Fig. S1

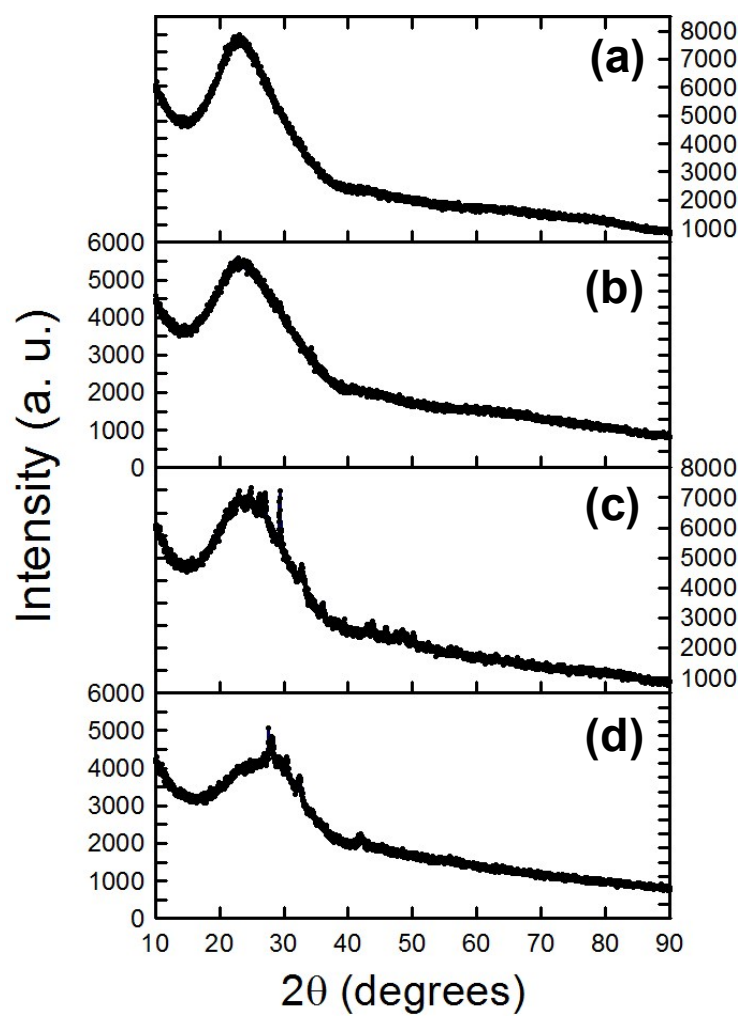

**Fig. S2**

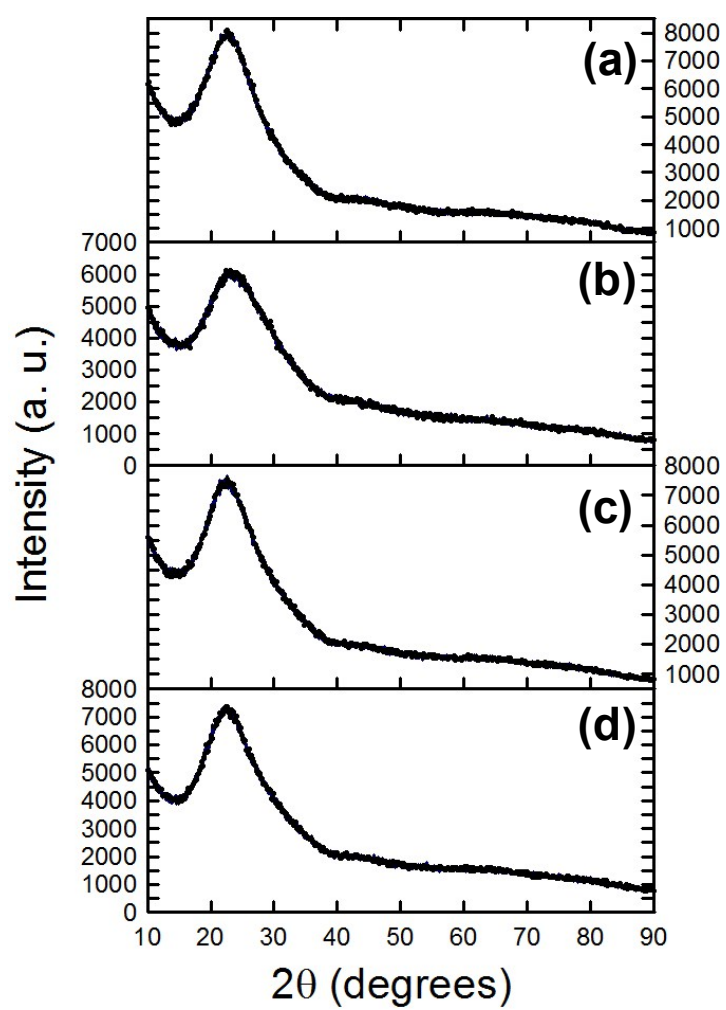

Fig. S3

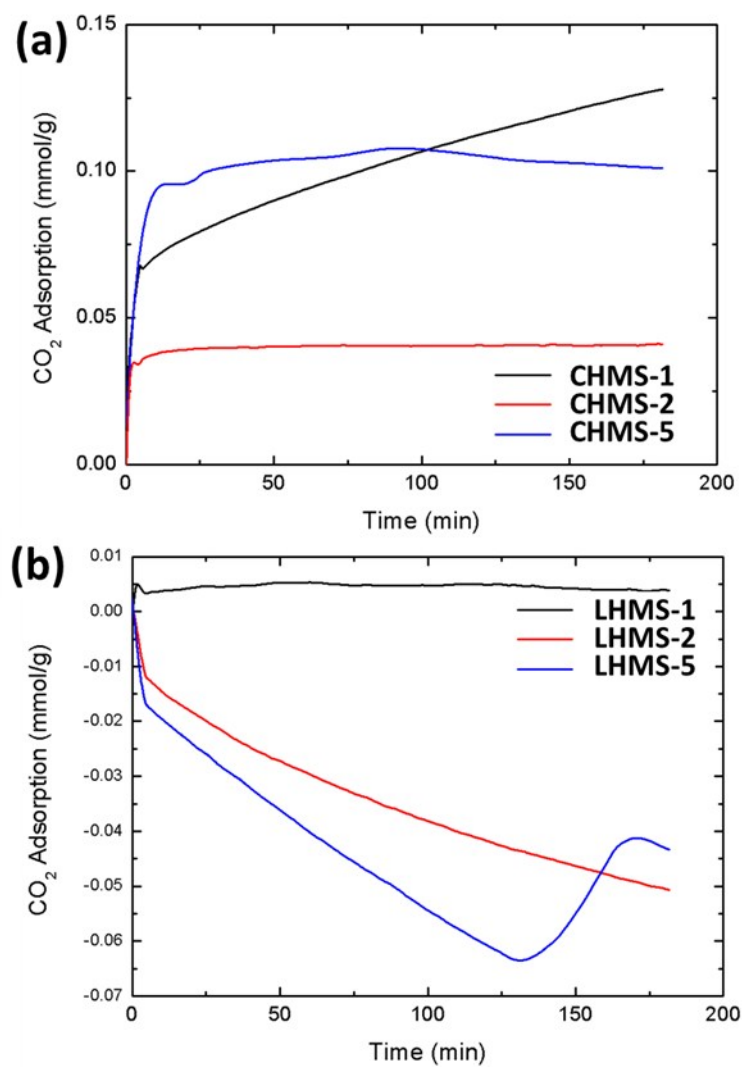

**Fig. S4**

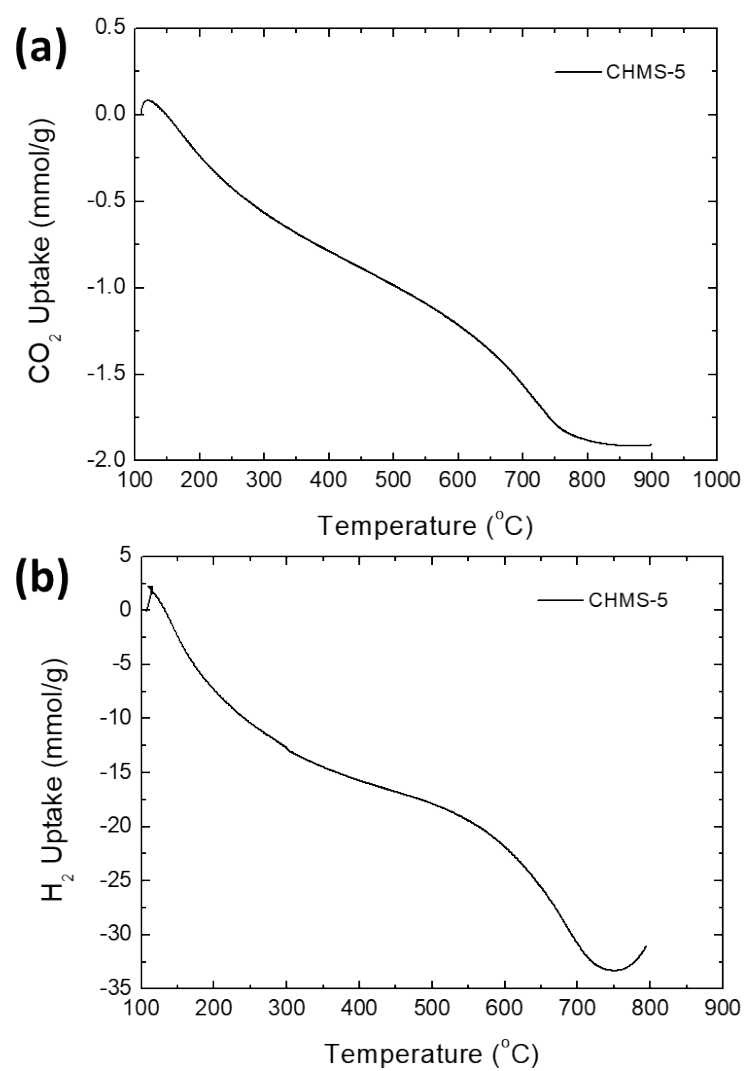

**Fig. S5**

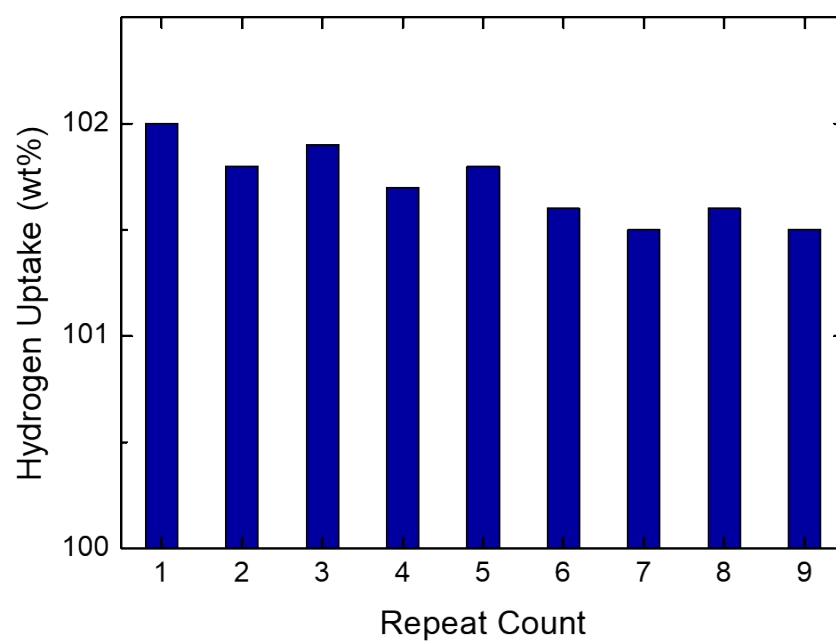

Supplement: c8ra05772a1.pdf [file c8ra05772a1.pdf]
